# Supplementary material
Source: PubMed Central journal article supplement (PMC4461443)
Supplement: NIHMS667477-supplement-1.pdf [file NIHMS667477-supplement-1.pdf]

| Complex<br>ferrocenoyl 17 $\beta$ -<br>hydroxy-estra-<br>1,3,5(10)-trien-3-olate | Torsion angle Cp and<br>ester (-CO <sub>2</sub> ) group ( $^{\circ}$ )<br><br><b>a</b> ( $^{\circ}$ ) | Torsion angle between<br>ester group and phenyl<br>ring ( $^{\circ}$ )<br><br><b>b</b> ( $^{\circ}$ ) | Energy                                                              |
|----------------------------------------------------------------------------------|-------------------------------------------------------------------------------------------------------|-------------------------------------------------------------------------------------------------------|---------------------------------------------------------------------|
| 1                                                                                | 0 $^{\circ}$ (co-planar)                                                                              | 0 $^{\circ}$                                                                                          | -7.11118 x 10 <sup>4</sup> eV/-<br>1.139337 x 10 <sup>-17</sup> KJ  |
| 2                                                                                | 87.0 $^{\circ}$                                                                                       | 117 $^{\circ}$                                                                                        | -7.110954 x 10 <sup>4</sup> eV/-<br>1.1393 10 <sup>-17</sup> KJ     |
| 3                                                                                | 0 $^{\circ}$                                                                                          | 62.6 $^{\circ}$                                                                                       | -7.110951 x 10 <sup>4</sup> / -<br>1.39300 10 <sup>-17</sup> KJ     |
| 4                                                                                | 90 $^{\circ}$                                                                                         | 62.6 $^{\circ}$                                                                                       | -7.110990 x 10 <sup>4</sup> eV/-<br>1.139306 10 <sup>-17</sup> KJ   |
| 5                                                                                | -144.1 $^{\circ}$                                                                                     | 62.6 $^{\circ}$                                                                                       | -7.110981 x 10 <sup>4</sup> eV/-<br>1.139305 10 <sup>-17</sup> KJ   |
| 6                                                                                | 180 $^{\circ}$                                                                                        | 62.6 $^{\circ}$                                                                                       | -7.110973 x 10 <sup>4</sup> eV/-<br>1.139304 x 10 <sup>-17</sup> KJ |
| 7                                                                                | 7.7 $^{\circ}$                                                                                        | 62.7 $^{\circ}$                                                                                       | -7.110815 x 10 <sup>4</sup> eV/-<br>1.139279 x 10 <sup>-17</sup> KJ |
| 8                                                                                | 180 (co-planar)                                                                                       | 62.7 $^{\circ}$                                                                                       | -7.110822 x 10 <sup>4</sup> eV/-<br>1.139280 x 10 <sup>-17</sup> KJ |
| 9                                                                                | -90                                                                                                   | 90 $^{\circ}$                                                                                         | -7.110811 x 10 <sup>4</sup> eV/-                                    |

Table 1. Simple point energies for nine conformations at different a and b torsion angles of ferrocenoyl 17 $\beta$ -hydroxy-estra-1,3,5(10)-trien-3-olate.
